# Supplementary material for: Coverage, Determinants of Use and Repurposing of Long-Lasting Insecticidal Nets Two Years After a Mass Distribution in Lihir Islands, Papua New Guinea: A Cross-Sectional Study
Source: Research Square preprint supplement (doi:10.21203/rs.3.rs-517737/v1), 2021-05-21
Supplement: Supplementary file 1 [file 7f2043a0307615af1ff55e28.docx]

**ADDITIONAL FILE 2- SUPPLEMENTARY MATERIAL**

Definitions of the LLIN maintenance and use indicators

| INDICATOR | DEFINITION | |
| --- | --- | --- |
| Proportion of households with at least one LLIN | |  | |
| Proportion of households with at least one LLIN for every two people | |  | |
| Proportion of population with adequate access to a LLIN within their household | |  | |
| Proportion of the population that slept under a LLIN the previous night | |  | |
| Proportion of children under five years old who slept under a LLIN the previous night | |  | |
